# Supplementary material
Source: publisher figshare collection journal article supplement (https://acs.figshare.com/ndownloader/files/5320318)
Supplement: Supplementary file 1 [file 5320318]

## Supporting Information

### Photochemical Generation of a Tryptophan Radical within the Subunit Interface of Ribonucleotide Reductase

Lisa Olshansky,<sup>a,b</sup> Brandon L. Greene,<sup>a</sup> Chelsea Finkbeiner,<sup>b</sup> JoAnne Stubbe,<sup>b,\*</sup> Daniel G. Nocera<sup>a,\*</sup>

<sup>a</sup> Department of Chemistry and Chemical Biology, 12 Oxford St., Harvard University, Cambridge, MA 02138. <sup>b</sup> Department of Chemistry, Massachusetts Institute of Technology, 77 Massachusetts Avenue, Cambridge, MA 02139.

stubbe@mit.edu, dnocera@fas.harvard.edu

| <i>Index</i>                                                                          | <i>Page</i> |
|---------------------------------------------------------------------------------------|-------------|
| Abbreviations                                                                         | 2           |
| Materials                                                                             | 2           |
| Experimental methods                                                                  | 2           |
| <b>Figure S1.</b> Transient absorption spectra collected in the absence of $\alpha_2$ | 4           |
| <b>Figure S2.</b> Single wavelength emission quenching traces and residuals           | 5           |

## Abbreviations

RNR, *E. coli* class Ia ribonucleotide reductase;  $\alpha_2$ , large subunit of RNR containing substrate and effector binding sites;  $\beta_2$ , small subunit of RNR containing the diiron-tyrosyl radical cofactor; PCET, proton-coupled electron transfer; [Re<sup>I</sup>], methylpyridyl rhenium(I) tricarbonyl phenanthroline phosphorus hexafluoride complex; photo $\beta_2$ , C<sub>268</sub>S/C<sub>305</sub>S/S<sub>355</sub>C- $\beta_2$  appended with [Re<sup>I</sup>]; W-photo $\beta_2$ , C<sub>268</sub>S/C<sub>305</sub>S/S<sub>355</sub>C/Y<sub>356</sub>W- $\beta_2$  appended with the [Re<sup>I</sup>] complex; TA, transient absorption; MALDI-TOF, matrix-assisted laser desorption/ionization-time of flight; MLCT, metal-to-ligand charge transfer; HU, hydroxyurea; ATP, adenosine 5'-triphosphate; CDP, cytidine 5'-diphosphate; [<sup>3</sup>H]-CDP, 5-tritiated cytidine 5'-diphosphate sodium salt hydrate; HEPES, 4-(2-hydroxyethyl)-piperazin-1-ylethanesulphonic acid; TR, thioredoxin; TRR, thioredoxin reductase; AP, calf alkaline phosphatase.

## Materials

**Generation of C<sub>268</sub>S/C<sub>305</sub>S/S<sub>355</sub>C/Y<sub>356</sub>W-pBAD-*nrdB* and Y<sub>356</sub>W-pBAD-*nrdB*** was achieved by site-directed mutagenesis using pBAD-*nrdB* as a template and the following forward (f) and reverse (r) primers. Point mutations are in red and the three-letter codon being mutated is underlined.

C<sub>268</sub>S (f): 5'– CGGAAATTGCCGAAGAGAGTAAGCAGGAGTGCTAT –3'

C<sub>268</sub>S (r): 5'– ATAGCACTCCTGCTTACTTCTCTTCGGCAATTTCCG –3'

C<sub>305</sub>S (f): 5'– GAATAAAGACATTCTCAGCCAGTACGTTGAATACATC –3'

C<sub>305</sub>S (r): 5'– GATGTATTCAACGTACTGGCTGAGAATGTCTTTATTC –3'

S<sub>355</sub>C/Y<sub>356</sub>W (f): 5'– GGAAGTGGAAGTCAGTTGTTGGCTGGTCGGGCAGATTG –3'

S<sub>355</sub>C/Y<sub>356</sub>W (r): 5'– CAATCTGCCCGACCAGCCAACAACTGACTTCCACTTCC –3'

Y<sub>356</sub>W (f): 5'– GGAAGTGGAAGTCAGTTCTTGGCTGGTCGGGCAG –3'

Y<sub>356</sub>W (r): 5'– CTGCCCCGACCAGCCAAGAACTGACTTCCACTTCC –3'

## Experimental methods

Nucleotide concentrations were calculated from the following extinction coefficients:  $\epsilon_{259}(\text{ATP}) = 15.4 \text{ mM}^{-1} \text{ cm}^{-1}$  and  $\epsilon_{271}(\text{CDP}) = 9.1 \text{ mM}^{-1} \text{ cm}^{-1}$ . The concentrations of  $\alpha_2$  and  $\beta_2$  were determined using  $\epsilon_{280}(\alpha_2) = 189 \text{ mM}^{-1} \text{ cm}^{-1}$ ,  $\epsilon_{280}(\beta_2) = 131 \text{ mM}^{-1} \text{ cm}^{-1}$ , and  $\epsilon_{280}([\text{Re}^I]-\beta_2) = 189 \text{ mM}^{-1} \text{ cm}^{-1}$ . Purity of subunits was determined by SDS-PAGE analysis and MALDI-TOF analysis, activity was determined by the spectrophotometric assay (described briefly below).<sup>1</sup>

<sup>1</sup> Bollinger, J. M. Jr.; Tong, W. H.; Ravi, N.; Huynh, B. H.; Edmondson, D. E.; Stubbe, J. *Meth. Enzymol.* **1995**, 258, 278–303.

**General methods and instrumentation.** Distilled deionized water (ddH<sub>2</sub>O) (18 M $\Omega$  cm<sup>-1</sup>) was used for all aqueous solutions and other uses of water. All buffers were adjusted to the noted pH at room temperature. Assay buffer consisted of 50 mM HEPES, 15 mM MgSO<sub>4</sub> and 1 mM EDTA adjusted to pH 7.6.

Absorption spectra in the UV and visible region were collected on a Varian Cary 5000 UV-vis-NIR spectrophotometer on samples as indicated. Temperature control was maintained with a Lauda RE106 circulating water bath. DNA sequencing was performed at the MIT Biopolymers Laboratory.

**RNR activity** was monitored through a continuous coupled-enzyme assay in which the consumption of NADPH was determined by monitoring the decrease in absorbance at 340 nm using the subunit to be measured in the presence of a five-fold excess of the other. Subunit 1 (5  $\mu$ M), ATP (3 mM), CDP (1 mM), TR (30  $\mu$ M), and TRR (0.5  $\mu$ M) were mixed in assay buffer in a final volume of 300  $\mu$ L. The assay was initiated by addition of subunit 2 (1  $\mu$ M) and NADPH (0.2 mM) and the change in A<sub>340</sub> was monitored for 1 min.

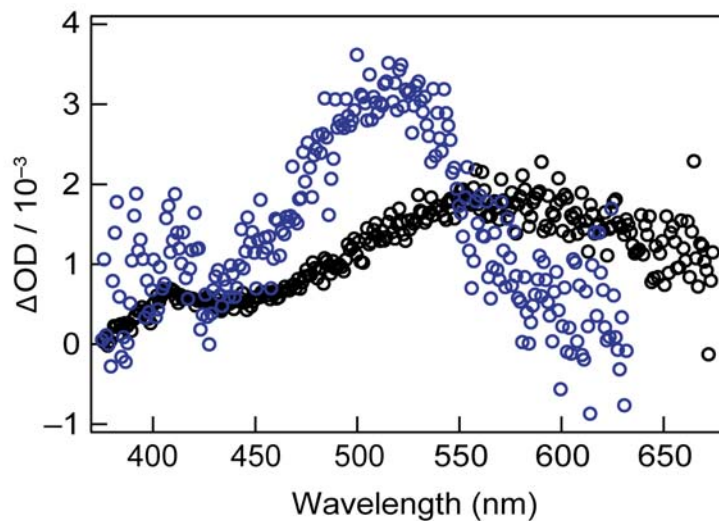

**Figure S1.** TA spectra of Y<sub>356</sub>W- and Y<sub>356</sub>F-photoβ<sub>2</sub> collected in the absence of α<sub>2</sub> 8 μs after the 355 nm excitation pulse. The displayed spectra are averages of 3 independently prepared samples, each containing either 50 μM Y<sub>356</sub>W-photoβ<sub>2</sub> or 30 μM Y<sub>356</sub>F-photoβ<sub>2</sub> (blue and black, respectively). Samples also contained 1 mM CDP, 3 mM ATP, and 10 mM Ru(NH<sub>3</sub>)<sub>6</sub>Cl<sub>3</sub>, in assay buffer at pH 7.6.

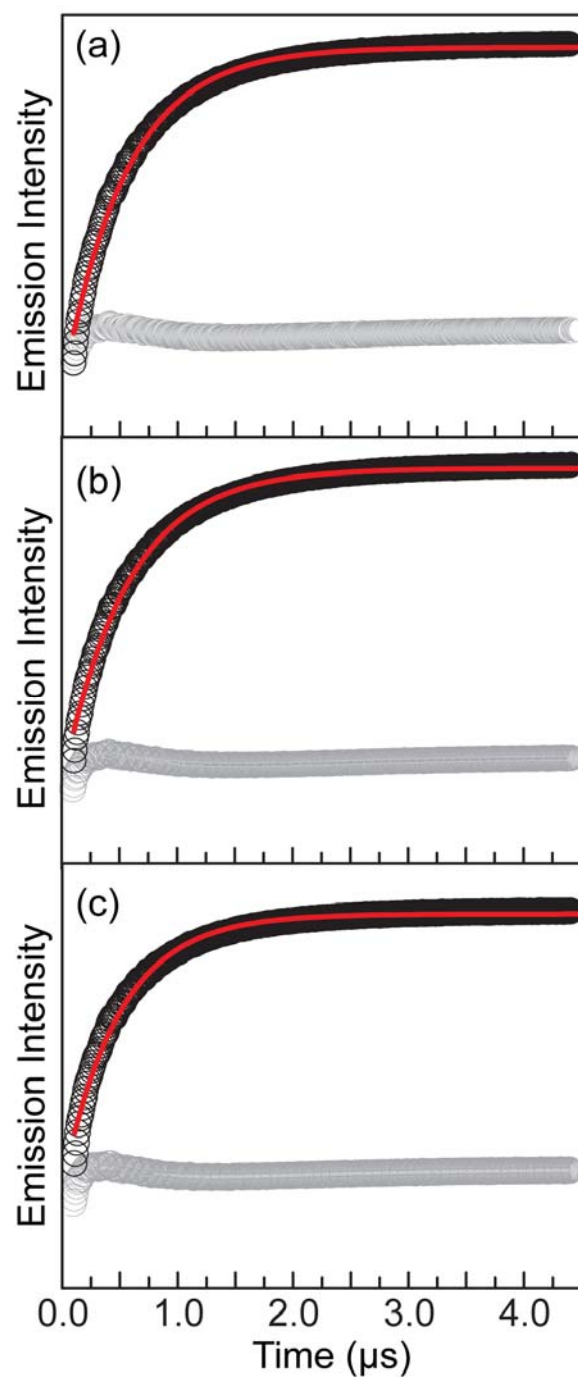

**Figure S2.** Representative emission quenching data (black circles), monoexponential fits to the data (red lines) and residuals (gray) for W-photo $\beta_2$  in the presence of wt- $\alpha_2$  (A), Y<sub>731</sub>F- $\alpha_2$  (B), and in the absence of  $\alpha_2$  (C), with CDP and ATP in assay buffer at pH 7.6 with  $\lambda_{\text{exc}} = 355$  nm and  $\lambda_{\text{det}} = 600$  nm.
